# Supplementary material for: Effects of Adolescent-Focused Integrated Social Protection on Depression: A Pragmatic Cluster-Randomized Controlled Trial of Tanzania’s Cash Plus Intervention
Source: PubMed Central journal article supplement (PMC9437816; doi:10.1093/aje/kwac093), 2022-05-17
Supplement: web_material_kwac093.pdf [file web_material_kwac093.pdf]

**WEB MATERIAL**

**Effects of Adolescent-Focused Integrated Social Protection on Depression: A Pragmatic Cluster-Randomized Controlled Trial of Tanzania’s Cash Plus Intervention**

Leah Prencipe, Tanja AJ Houweling, Frank van Lenthe, Lusajo Kajula, and Tia Palermo on behalf of the Adolescent Cash Plus Evaluation Team

Table of Contents

|                   |   |
|-------------------|---|
| Web Table 1 ..... | 2 |
| Web Table 2 ..... | 4 |
| Web Table 3 ..... | 5 |

**Web Table 1.** Psychosocial survey items

| 10-item Center for Epidemiologic Studies Depression Scale                                                                                                                                                                                                                                          |
|----------------------------------------------------------------------------------------------------------------------------------------------------------------------------------------------------------------------------------------------------------------------------------------------------|
| <p>(1) <i>In the past seven days, how often did you sleep well? (Reverse-coded)</i><br/>0 = rarely (&lt; 1 day)<br/>1 = some or a little of the time (1–2 days)<br/>2 = occasionally or a moderate amount of time (3–4 days)<br/>3 = most or all of the time (5–7 days)</p>                        |
| <p>(2) <i>In the past seven days, how often were you happy? (Reverse-coded)</i><br/>0 = rarely (&lt; 1 day)<br/>1 = some or a little of the time (1–2 days)<br/>2 = occasionally or a moderate amount of time (3–4 days)<br/>3 = most or all of the time (5–7 days)</p>                            |
| <p>(3) <i>In the past seven days, how often did you have trouble concentrating?</i><br/>0 = rarely (&lt; 1 day)<br/>1 = some or a little of the time (1–2 days)<br/>2 = occasionally or a moderate amount of time (3–4 days)<br/>3 = most or all of the time (5–7 days)</p>                        |
| <p>(4) <i>In the past seven days, how often did you feel hopeful about the future? (Reverse-coded)</i><br/>0 = rarely (&lt; 1 day)<br/>1 = some or a little of the time (1–2 days)<br/>2 = occasionally or a moderate amount of time (3–4 days)<br/>3 = most or all of the time (5–7 days)</p>     |
| <p>(5) <i>In the past seven days, how often did you feel that everything you did was an effort?</i><br/>0 = rarely (&lt; 1 day)<br/>1 = some or a little of the time (1–2 days)<br/>2 = occasionally or a moderate amount of time (3–4 days)<br/>3 = most or all of the time (5–7 days)</p>        |
| <p>(6) <i>In the past seven days, how often did you feel lonely?</i><br/>0 = rarely (&lt; 1 day)<br/>1 = some or a little of the time (1–2 days)<br/>2 = occasionally or a moderate amount of time (3–4 days)<br/>3 = most or all of the time (5–7 days)</p>                                       |
| <p>(7) <i>In the past seven days, how often did you feel depressed?</i><br/>0 = rarely (&lt; 1 day)<br/>1 = some or a little of the time (1–2 days)<br/>2 = occasionally or a moderate amount of time (3–4 days)<br/>3 = most or all of the time (5–7 days)</p>                                    |
| <p>(8) <i>In the past seven days, how often did you feel that you could not get going?</i><br/>0 = rarely (&lt; 1 day)<br/>1 = some or a little of the time (1–2 days)<br/>2 = occasionally or a moderate amount of time (3–4 days)<br/>3 = most or all of the time (5–7 days)</p>                 |
| <p>(9) <i>In the past seven days, how often were you bothered by things that don't usually bother you?</i><br/>0 = rarely (&lt; 1 day)<br/>1 = some or a little of the time (1–2 days)<br/>2 = occasionally or a moderate amount of time (3–4 days)<br/>3 = most or all of the time (5–7 days)</p> |
| <p>(10) <i>In the past seven days, how often did you feel fearful?</i><br/>0 = rarely (&lt; 1 day)<br/>1 = some or a little of the time (1–2 days)<br/>2 = occasionally or a moderate amount of time (3–4 days)<br/>3 = most or all of the time (5–7 days)</p>                                     |

|                                                                                                                                                                                                                                                                                                                                                                                                                                                                                                                                                      |
|------------------------------------------------------------------------------------------------------------------------------------------------------------------------------------------------------------------------------------------------------------------------------------------------------------------------------------------------------------------------------------------------------------------------------------------------------------------------------------------------------------------------------------------------------|
| Self-esteem                                                                                                                                                                                                                                                                                                                                                                                                                                                                                                                                          |
| <p>How do you see yourself relative to the following statements? Please rate from 1 (strongly agree) to 5 (strongly disagree).</p> <p>(1) You feel that you have many good qualities.<br/> (2) On the whole, you are satisfied with yourself.</p>                                                                                                                                                                                                                                                                                                    |
| Quality of life                                                                                                                                                                                                                                                                                                                                                                                                                                                                                                                                      |
| <p>Imagine a ladder where on the bottom, the first step, represents the worst possible life for you and the highest step, the tenth, represents the best possible life for you. On which step of the ladder would you say you are today?</p>                                                                                                                                                                                                                                                                                                         |
| Locus of control                                                                                                                                                                                                                                                                                                                                                                                                                                                                                                                                     |
| <p>Please rate from 1 (strongly agree) to 5 (strongly disagree).</p> <p>(1) It's not always wise for you to plan too far ahead because many things turn out to be a matter of good or bad fortune (reverse-coded)<br/> (2) Your life is determined by your own actions<br/> (3) When you get what you want, it is usually the result of your own actions<br/> (4) You feel like what happens in your life is mostly determined by others (reverse-coded)<br/> (5) Getting what you want requires pleasing the influential people (reverse-coded)</p> |

**Web Table 2.** Baseline Characteristics of Participants in the Intervention Group by Intervention Uptake, Adolescent Cash Plus Evaluation, Tanzania, 2018–2019

| Characteristic                               | Attended Course |              |                      | Met With Mentor <sup>a</sup> |              |                      | Received Productive Grant |              |                      |
|----------------------------------------------|-----------------|--------------|----------------------|------------------------------|--------------|----------------------|---------------------------|--------------|----------------------|
|                                              | Yes (n=475)     | No (n = 466) | P value <sup>b</sup> | Yes (n=258)                  | No (n=664)   | P value <sup>b</sup> | Yes (n=278)               | No (n=663)   | P value <sup>b</sup> |
|                                              | No. (%)         | No. (%)      |                      | No. (%)                      | No. (%)      |                      | No. (%)                   | No. (%)      |                      |
| <b>Household characteristics</b>             |                 |              |                      |                              |              |                      |                           |              |                      |
| Wealth level <sup>c</sup>                    |                 |              | 0.533                |                              |              | 0.773                |                           |              | 0.129                |
| Poorest                                      | 183 (39%)       | 174 (38%)    |                      | 94 (36%)                     | 258 (39%)    |                      | 113 (41%)                 | 244 (37%)    |                      |
| Middle                                       | 165 (35%)       | 151 (33%)    |                      | 89 (34%)                     | 221 (33%)    |                      | 99 (36%)                  | 217 (33%)    |                      |
| Richest                                      | 127 (27%)       | 139 (30%)    |                      | 75 (29%)                     | 183 (28%)    |                      | 66 (24%)                  | 200 (30%)    |                      |
| Household size <sup>d</sup>                  | 4.89 (1.92)     | 5.12 (2.05)  | 0.077                | 4.82 (1.90)                  | 5.08 (2.03)  | 0.079                | 4.95 (2.00)               | 5.03 (1.99)  | 0.562                |
| Female-headed household                      | 313 (66%)       | 296 (64%)    | 0.446                | 169 (66%)                    | 426 (64%)    | 0.701                | 186 (67%)                 | 423 (64%)    | 0.363                |
| Region                                       |                 |              | <0.001               |                              |              | <0.001               |                           |              | <0.001               |
| Iringa                                       | 185 (39%)       | 287 (62%)    |                      | 104 (40%)                    | 354 (53%)    |                      | 92 (33%)                  | 380 (57%)    |                      |
| Mbeya                                        | 290 (61%)       | 179 (38%)    |                      | 154 (60%)                    | 310 (47%)    |                      | 186 (67%)                 | 283 (43%)    |                      |
| <b>Adolescent characteristics</b>            |                 |              |                      |                              |              |                      |                           |              |                      |
| Sex                                          |                 |              | 0.012                |                              |              | 0.002                |                           |              | <0.001               |
| Female                                       | 226 (48%)       | 184 (39%)    |                      | 132 (51%)                    | 266 (40%)    |                      | 148 (53%)                 | 262 (40%)    |                      |
| Male                                         | 249 (52%)       | 282 (61%)    |                      | 126 (49%)                    | 398 (60%)    |                      | 130 (47%)                 | 401 (60%)    |                      |
| Age in years <sup>d</sup>                    | 15.91 (1.50)    | 16.10 (1.60) | 0.053                | 15.88 (1.49)                 | 16.06 (1.58) | 0.105                | 15.87 (1.51)              | 16.06 (1.57) | 0.092                |
| Education/employment status                  |                 |              | 0.276                |                              |              | 0.050                |                           |              | 0.281                |
| Attending school/training                    | 249 (52%)       | 249 (53%)    |                      | 141 (55%)                    | 346 (52%)    |                      | 140 (50%)                 | 358 (54%)    |                      |
| Engaged in paid work                         | 45 (9%)         | 50 (11%)     |                      | 15 (6%)                      | 79 (12%)     |                      | 24 (9%)                   | 71 (11%)     |                      |
| In school/training and paid work             | 22 (5%)         | 11 (2%)      |                      | 11 (4%)                      | 22 (3%)      |                      | 13 (5%)                   | 20 (3%)      |                      |
| Not in employment, education or training     | 159 (33%)       | 156 (33%)    |                      | 91 (35%)                     | 217 (33%)    |                      | 101 (36%)                 | 214 (32%)    |                      |
| Has a partner                                | 78 (16%)        | 60 (13%)     | 0.124                | 43 (17%)                     | 93 (14%)     | 0.306                | 44 (16%)                  | 94 (14%)     | 0.514                |
| Social support score, 1-5 <sup>d,e</sup>     | 4.00 (0.66)     | 4.03 (0.59)  | 0.538                | 3.99 (0.68)                  | 4.02 (0.61)  | 0.424                | 3.94 (0.67)               | 4.05 (0.61)  | 0.012                |
| <b>Adolescent psychosocial well-being</b>    |                 |              |                      |                              |              |                      |                           |              |                      |
| Self-esteem score, 1-5 <sup>d,f</sup>        | 3.96 (0.78)     | 3.97 (0.75)  | 0.729                | 3.92 (0.76)                  | 3.98 (0.77)  | 0.307                | 3.94 (0.79)               | 3.97 (0.76)  | 0.584                |
| Quality of life scale, 1-10 <sup>d,g</sup>   | 3.86 (2.48)     | 3.92 (2.48)  | 0.703                | 3.70 (2.45)                  | 3.97 (2.48)  | 0.135                | 3.68 (2.39)               | 3.98 (2.51)  | 0.087                |
| Locus of control score, 1-5 <sup>d,h</sup>   | 3.24 (0.48)     | 3.16 (0.48)  | 0.014                | 3.24 (0.49)                  | 3.18 (0.48)  | 0.073                | 3.19 (0.47)               | 3.20 (0.49)  | 0.670                |
| <b>Adolescent mental health <sup>i</sup></b> |                 |              |                      |                              |              |                      |                           |              |                      |
| Depression scale, 1-30 <sup>d</sup>          | 6.53 (4.61)     | 6.82 (4.91)  | 0.352                | 6.50 (4.50)                  | 6.74 (4.85)  | 0.494                | 6.46 (4.41)               | 6.76 (4.90)  | 0.375                |
| Exhibits depressive symptomatology           | 131 (28%)       | 143 (31%)    | 0.294                | 69 (27%)                     | 199 (30%)    | 0.333                | 74 (27%)                  | 200 (30%)    | 0.275                |

<sup>a</sup> Mentorship missing for 19 youth due to incorrect skip at start of endline data collection

<sup>b</sup> P values were derived from independent t test for continuous variables and chi square for categorical variables.

<sup>c</sup> Household wealth was not available for two observations

<sup>d</sup> Values are expressed as mean (standard deviation).

<sup>e</sup> Social support score is the average of four Multidimensional Scale of Perceived Social Support items.

<sup>f</sup> Self-esteem score is the average of two Rosenberg's self-esteem scale items.

<sup>g</sup> Quality of life is measured using a 10-point Cantril's Ladder of Life Scale.

<sup>h</sup> Locus of control score is the average of five Levenson's multidimensional locus of control scale items.

<sup>i</sup> Depression is measured using the 10-item Centre for Epidemiological Depression full scale as well as a binary measurement ( $\geq 10$  scale score) which indicates exhibiting depressive symptomatology.

**Web Table 3.** Intervention effects on primary and exploratory (mediating) outcomes at endline by sex, Adolescent Cash Plus Evaluation, Tanzania, 2018–2019

| Outcome                                    | Males                   |                    |                          |                           |         |      | Females                 |                    |                          |                           |         |      |
|--------------------------------------------|-------------------------|--------------------|--------------------------|---------------------------|---------|------|-------------------------|--------------------|--------------------------|---------------------------|---------|------|
|                                            | Intervention<br>(n=941) | Control<br>(n=992) | RD (95% CI) <sup>a</sup> | aOR (95% CI) <sup>a</sup> | P Value | ICC  | Intervention<br>(n=941) | Control<br>(n=992) | RD (95% CI) <sup>a</sup> | aOR (95% CI) <sup>a</sup> | P Value | ICC  |
|                                            | N (%)                   | N (%)              |                          |                           |         |      | N (%)                   | N (%)              |                          |                           |         |      |
| <b>Primary outcomes<sup>b</sup></b>        |                         |                    |                          |                           |         |      |                         |                    |                          |                           |         |      |
| Depression scale, 1-30 <sup>c</sup>        | 5.83 (4.39)             | 6.12 (4.49)        | -0.20 (-0.80, 0.40)      |                           | 0.509   | 0.04 | 5.35 (4.25)             | 5.92 (5.10)        | -0.56 (-1.21, 0.09)      |                           | 0.091   | 0.04 |
| Exhibits depressive symptomatology         | 118 (22%)               | 153 (29%)          |                          | 0.73 (0.54, 0.98)         | 0.038   | 0.06 | 64 (16%)                | 109 (24%)          |                          | 0.59 (0.41, 0.85)         | 0.004   | 0.03 |
| <b>Exploratory outcomes</b>                |                         |                    |                          |                           |         |      |                         |                    |                          |                           |         |      |
| Education/employment status                |                         |                    |                          |                           |         |      |                         |                    |                          |                           |         |      |
| Attending school/training                  | 152 (29%)               | 145 (27%)          |                          | 0.96 (0.68, 1.37)         | 0.833   | 0.04 | 143 (35%)               | 183 (40%)          |                          | 0.79 (0.55, 1.14)         | 0.208   | 0.00 |
| Engaged in paid work                       | 160 (30%)               | 145 (27%)          |                          | 1.32 (0.98, 1.77)         | 0.068   | 0.00 | 59 (14%)                | 58 (13%)           |                          | 1.21 (0.80, 1.83)         | 0.361   | 0.03 |
| In school/training and paid work           | 12 (2%)                 | 24 (4%)            |                          | 0.46 (0.20, 1.04)         | 0.062   | 0.18 | 9 (2%)                  | 20 (4%)            |                          | 0.45 (0.18, 1.12)         | 0.085   | 0.24 |
| Not in employment, education or training   | 207 (39%)               | 220 (41%)          |                          | 0.85 (0.64, 1.13)         | 0.261   | 0.02 | 199 (49%)               | 197 (43%)          |                          | 1.28 (0.94, 1.75)         | 0.123   | 0.00 |
| Has a partner                              | 221 (42%)               | 225 (42%)          |                          | 1.07 (0.81, 1.42)         | 0.616   | 0.03 | 170 (41%)               | 184 (40%)          |                          | 1.11 (0.81, 1.52)         | 0.517   | 0.03 |
| Self-esteem score, 1-5 <sup>c,d</sup>      | 3.77 (0.80)             | 3.72 (0.77)        | 0.05 (-0.05, 0.15)       |                           | 0.321   | 0.02 | 3.98 (0.77)             | 3.81 (0.86)        | 0.17 (0.06, 0.28)        |                           | 0.003   | 0.00 |
| Quality of life scale, 1-10 <sup>c,e</sup> | 4.70 (2.14)             | 4.72 (2.00)        | -0.06 (-0.34, 0.22)      |                           | 0.674   | 0.04 | 5.03 (2.08)             | 4.89 (1.98)        | 0.14 (-0.16, 0.44)       |                           | 0.369   | 0.08 |
| Locus of control score, 1-5 <sup>c,f</sup> | 3.25 (0.46)             | 3.28 (0.46)        | -0.03 (-0.08, 0.03)      |                           | 0.315   | 0.02 | 3.35 (0.45)             | 3.28 (0.48)        | 0.06 (0.00, 0.13)        |                           | 0.043   | 0.05 |

Abbreviations: aOR, adjusted odds ratio; CI, confidence interval; ICC, intraclass correlation coefficient; RD, risk difference.

<sup>a</sup> Adjusted for age in years, the corresponding outcome at baseline, and district/community size fixed effects (the strata). Multilevel methodology was used to account for clustering of outcome within and between villages. Robust 95% CIs in parentheses.

<sup>b</sup> Primary outcomes are measured using the 10-item Center for Epidemiologic Studies Depression Scale as well as a binary measurement ( $\geq 10$  scale score) which indicates exhibiting depressive symptomatology.

<sup>c</sup> Values are expressed as mean (standard deviation).

<sup>d</sup> Self-esteem score is the average of two Rosenberg's self-esteem scale items.

<sup>e</sup> Quality of life is measured using a 10-point Cantril's Ladder of Life Scale.

<sup>f</sup> Locus of control score is the average of five Levenson's multidimensional locus of control scale items.
